# Supplementary material for: An electrospun flexible Janus nanoribbon array endowed with simultaneously tuned trifunctionality of electrically conductive anisotropy, photoluminescence and magnetism
Source: Royal Society of Chemistry journal article supplement (doi:10.1039/c7nj03090h), 2017-01-01
Supplement: c7nj03090h1.pdf [file c7nj03090h1.pdf]

## Electronic Supplementary Information (ESI)

# Electrospun Flexible Janus Nanoribbons Array Endowed with Simultaneously Tuned Trifunctionality of Electrically Conductive Anisotropy, Photoluminescence and Magnetism

Jiao Tian, Qianli Ma, Wensheng Yu, Xiangting Dong\*, Ying Yang, Bo Zhao, Jinxian Wang, Guixia Liu

*Key Laboratory of Applied Chemistry and Nanotechnology at Universities of Jilin Province, Changchun University of Science and Technology, Changchun 130022.  
Fax: 86043185383815; Tel: 86043185582574; E-mail: dongxiangting888@163.com*

### Preparation of PMMA

0.1000 g of BPO and 100 mL of MMA were added into a 250-mL three-necked flask with a backflow device and stirred vigorously at 90-95 °C. When the viscosity of the mixture solution reached that of glycerol, the heating was stopped and the mixture was naturally cooled to room temperature. The obtained gelatinous solution was loaded into test tubes, and the influx height was 5-7 cm. Then the tubes were put in an electric vacuum oven at 50 °C for 48 h, and the gelatinous solution was solidified. Finally, the temperature was raised to 110 °C for 2 h to terminate the reaction in the oven.

### Synthesis of Dy(BA)<sub>3</sub>phen and Eu(BA)<sub>3</sub>phen complexes

Dy(BA)<sub>3</sub>phen powders were synthesized according to the traditional method as described in the reference<sup>36</sup>. 1.8775 g of Dy<sub>2</sub>O<sub>3</sub> was dissolved in 10 mL of concentrated nitric acid and then crystallized via evaporation of excess nitric acid and water by heating, and Dy(NO<sub>3</sub>)<sub>3</sub>·6H<sub>2</sub>O powders were acquired. Dy(NO<sub>3</sub>)<sub>3</sub> ethanol solution was prepared by adding 20 mL of anhydrous ethanol into the above Dy(NO<sub>3</sub>)<sub>3</sub>·6H<sub>2</sub>O. 3.6640 g of BA and 1.8020 g of phen were dissolved in 200 mL of ethanol. The Dy(NO<sub>3</sub>)<sub>3</sub> ethanol solution was then added into the mixed solution of BA and phen with magnetic agitation for 3 h at 60 °C. The precipitates were collected by filtration and dried at 60 °C for 12 h. The synthetic method of Eu(BA)<sub>3</sub>phen complexes was similar to the above method, except that the using dosages of Eu<sub>2</sub>O<sub>3</sub>, BA and phen were 1.7596 g, 3.6636 g and 1.9822 g, respectively.

### Preparation of oleic acid modified Fe<sub>3</sub>O<sub>4</sub> NPs

Fe<sub>3</sub>O<sub>4</sub> NPs were obtained *via* a facile coprecipitation synthetic method, and PEG

was used as the protective agent to prevent the particles from aggregation. One typical synthetic procedure was as follows: 5.4060 g of  $\text{FeCl}_3 \cdot 6\text{H}_2\text{O}$ , 2.7800 g of  $\text{FeSO}_4 \cdot 7\text{H}_2\text{O}$ , 4.0400 g of  $\text{NH}_4\text{NO}_3$  and 1.9000 g of PEG were added into 100 mL of deionized water to form uniform solution under vigorous stirring 50 °C. To prevent the oxidation of  $\text{Fe}^{2+}$ , the reactive mixture was kept under argon atmosphere. After the mixture had been bubbled with argon for 30 min, 0.1 mol·L<sup>-1</sup> of  $\text{NH}_3 \cdot \text{H}_2\text{O}$  was dropwise added into the mixture to adjust the pH value above 11. Then the system was continuously bubbled with argon for 20 min at 50 °C, and black precipitates were formed. The precipitates were collected from the solution by magnetic separation, washed with deionized water for three times, and then dried in an electric vacuum oven for 12 h at 60 °C.

To improve the monodispersity, stability and solubility of  $\text{Fe}_3\text{O}_4$  NPs in the spinning solution, the as-prepared  $\text{Fe}_3\text{O}_4$  NPs were then coated with oleic acid (OA) as below: 2.0000 g of the as-prepared  $\text{Fe}_3\text{O}_4$  NPs were ultrasonically dispersed in 100 mL of deionized water for 20 min. The suspension was heated to 80 °C under argon atmosphere with vigorous mechanical stirring for 30 min and then 1 mL of OA was dropwise added. Reaction was stopped after heating and stirring the mixture for 40 min. The precipitates were collected from the solution by magnetic separation, washed with ethyl alcohol for three times, and then dried in an electric vacuum oven at 60 °C for 6 h.

The morphology of the as-prepared  $\text{Fe}_3\text{O}_4$  NPs was observed by means of transmission electron microscopy (TEM), as presented in Figure S1. The saturation magnetization of  $\text{Fe}_3\text{O}_4$  NPs is 35.31 emu·g<sup>-1</sup>, as seen in Figure S2.

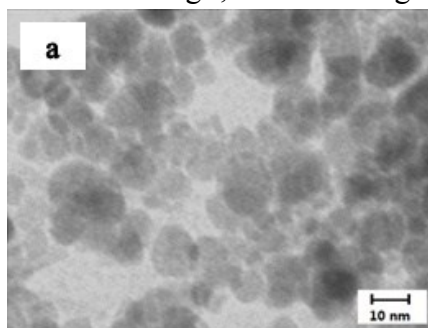

Figure S1 TEM image of  $\text{Fe}_3\text{O}_4$  NPs

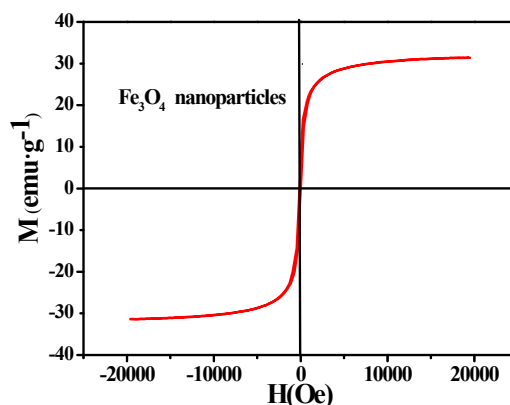

Figure S2 Hysteresis loops of the  $\text{Fe}_3\text{O}_4$  NPs
